# Supplementary material
Source: PubMed Central journal article supplement (PMC3966292)
Supplement: NIHMS561783-supplement-supplementary_info.pdf [file NIHMS561783-supplement-supplementary_info.pdf]

**Supplementary Information for:**

**Genome-wide association study identifies a susceptibility locus at 21q21 for ventricular fibrillation in acute myocardial infarction**

Connie R. Bezzina, Raha Pazoki, Abdennasser Bardai, Roos F. Marsman, Jonas S.S.G. de Jong, Marieke T. Blom, Brendon P. Scicluna, J. Wouter Jukema, Navin R. Bindraban, Peter Lichtner, Arne Pfeufer, Nanette Bishopric, Dan M. Roden, Thomas Meitinger, Sumeet S. Chugh, Robert J. Myerburg, Xavier Jouven, Stefan Kääh, Lukas R.C. Dekker, Hanno L. Tan, Michael W.T. Tanck, Arthur A.M. Wilde

**Supplementary Table 1. Most Significant Associations between Single Nucleotide Polymorphisms (SNPs) and Ventricular Fibrillation in the AGNES case-control set.**

| SNP        | Chromosome Position | Position * | Location   | Minor Allele | Major Allele | Frequency Minor Allele † | Imputed (yes/no) | Rsq  | Odds Ratio Per Copy of Minor Allele (95% CI) ‡ | P Value ‡              |
|------------|---------------------|------------|------------|--------------|--------------|--------------------------|------------------|------|------------------------------------------------|------------------------|
| rs2824293  | 21                  | 17709385   | Intergenic | G            | A            | 0.47                     | yes              | 1.00 | 1.78 (1.47,2.13)                               | 3.34×10 <sup>-10</sup> |
| rs2824292  | 21                  | 17709047   | Intergenic | G            | A            | 0.47                     | no               | 1.00 | 1.78 (1.47,2.13)                               | 3.36×10 <sup>-10</sup> |
| rs208910   | 21                  | 17708105   | Intergenic | C            | T            | 0.47                     | yes              | 0.99 | 1.77 (1.48,2.13)                               | 4.42×10 <sup>-10</sup> |
| rs12483129 | 21                  | 17711037   | Intergenic | C            | T            | 0.49                     | yes              | 0.96 | 0.58 (0.48,0.70)                               | 6.07×10 <sup>-09</sup> |
| rs9978331  | 21                  | 17714804   | Intergenic | G            | A            | 0.48                     | yes              | 0.97 | 0.59 (0.49,0.70)                               | 1.35×10 <sup>-08</sup> |
| rs2824294  | 21                  | 17709789   | Intergenic | T            | C            | 0.48                     | no               | 1.00 | 0.60 (0.50,0.72)                               | 3.61×10 <sup>-08</sup> |
| rs13050588 | 21                  | 17721619   | Intergenic | T            | C            | 0.37                     | yes              | 0.96 | 1.69 (1.40,2.04)                               | 4.84×10 <sup>-08</sup> |
| rs4818351  | 21                  | 17720626   | Intergenic | C            | T            | 0.37                     | yes              | 0.96 | 1.69 (1.40,2.05)                               | 4.92×10 <sup>-08</sup> |
| rs1493100  | 21                  | 17713763   | Intergenic | G            | A            | 0.37                     | yes              | 0.97 | 1.69 (1.39,2.04)                               | 6.07×10 <sup>-08</sup> |
| rs8130544  | 21                  | 17708212   | Intergenic | C            | T            | 0.36                     | no               | 1.00 | 1.63 (1.35,1.97)                               | 3.22×10 <sup>-07</sup> |
| rs2824290  | 21                  | 17707528   | Intergenic | A            | G            | 0.64                     | yes              | 0.99 | 0.61 (0.51,0.74)                               | 3.31×10 <sup>-07</sup> |
| rs2824289  | 21                  | 17706394   | Intergenic | A            | T            | 0.36                     | yes              | 0.99 | 1.63 (1.35,1.97)                               | 3.33×10 <sup>-07</sup> |
| rs1353342  | 9                   | 78064589   | Intergenic | A            | C            | 0.11                     | no               | 1.00 | 0.46 (0.34,0.63)                               | 3.34×10 <sup>-07</sup> |
| rs208918   | 21                  | 17719150   | Intergenic | T            | A            | 0.49                     | yes              | 0.97 | 1.59 (1.33,1.92)                               | 3.57×10 <sup>-07</sup> |
| rs2824288  | 21                  | 17702254   | Intergenic | G            | C            | 0.36                     | yes              | 0.98 | 1.61 (1.33,1.96)                               | 4.69×10 <sup>-07</sup> |
| rs208926   | 21                  | 17722200   | Intergenic | C            | A            | 0.48                     | no               | 1.00 | 1.56 (1.31,1.88)                               | 5.13×10 <sup>-07</sup> |
| rs12090554 | 1                   | 183818971  | Intergenic | A            | G            | 0.23                     | no               | 1.00 | 0.58 (0.47,0.72)                               | 7.89×10 <sup>-07</sup> |

\* Based on Build 36.2. † Allele Frequency was based on the total AGNES sample. ‡ Odds ratios are adjusted for age and sex. ‡ The P-values are corrected for genomic control factor. Rsq estimates the squared correlation between imputed and true genotypes.

**Supplementary Table 2. Genotype distributions in the patient samples studied and in a sample of the general population.**

| Sample               | N   | Frequencies (95% CI) |                 |                  |
|----------------------|-----|----------------------|-----------------|------------------|
|                      |     | rs2824292            |                 |                  |
|                      |     | AA                   | AG              | GG               |
| AGNES cases          | 513 | 0.22(0.19-0.26)      | 0.48(0.44-0.52) | 0.30(0.26-0.34)  |
| AGNES controls       | 457 | 0.37(0.32-0.41)      | 0.48(0.43-0.52) | 0.15(0.12-0.19)  |
| ARREST-MI (cases)    | 146 | 0.25(0.18-0.32)      | 0.47(0.39-0.55) | 0.27(0.20-0.35)  |
| GENDER-MI (controls) | 391 | 0.35(0.30-0.40)      | 0.48(0.43-0.53) | 0.17(0.13-0.21)  |
| General Population   | 492 | 0.29(0.25-0.33)      | 0.52(0.48-0.57) | 0.19(0.16-0.23)  |
|                      |     | rs1353342            |                 |                  |
|                      |     | GG                   | GT              | TT               |
| AGNES cases          | 514 | 0.86(0.83-0.89)      | 0.13(0.10-0.16) | 0.01(0.00-0.01)  |
| AGNES controls       | 457 | 0.73(0.69-0.77)      | 0.25(0.21-0.29) | 0.02(0.01-0.03)  |
| ARREST-MI (cases)    | 146 | 0.82(0.76-0.88)      | 0.17(0.11-0.23) | 0.01(-0.01-0.02) |
| GENDER-MI (controls) | 391 | 0.79(0.75-0.83)      | 0.2(0.16-0.24)  | 0.01(0.0-0.02)   |
| General Population   | 488 | 0.79(0.75-0.83)      | 0.2(0.16-0.23)  | 0.01(0.0-0.02)   |
|                      |     | rs12090554           |                 |                  |
|                      |     | GG                   | AG              | AA               |
| AGNES cases          | 515 | 0.67(0.63-0.71)      | 0.29(0.25-0.33) | 0.04(0.02-0.06)  |
| AGNES controls       | 455 | 0.51(0.46-0.56)      | 0.42(0.38-0.47) | 0.07(0.04-0.09)  |
| ARREST-MI (cases)    | 143 | 0.66(0.59-0.74)      | 0.31(0.24-0.39) | 0.02(0.0-0.04)   |
| GENDER-MI (controls) | 391 | 0.58(0.53-0.62)      | 0.38(0.34-0.43) | 0.04(0.02-0.06)  |
| General Population   | 477 | 0.57(0.52-0.61)      | 0.39(0.34-0.43) | 0.05(0.03-0.06)  |

**Supplementary Table 3. Genotype frequencies and Odds Ratio (95% CI) for rs2824292 based on time-to-VF from onset of complaints.**

|                 | <b>Homozygous<br/>for major allele</b> | <b>Heterozygous</b> | <b>Homozygous<br/>for minor allele</b> | <b>Odds ratio for VF<br/>(95% CI) additive<br/>model*</b> | <b>P value*</b>      | <b>P value §</b> |
|-----------------|----------------------------------------|---------------------|----------------------------------------|-----------------------------------------------------------|----------------------|------------------|
| No VF           | 168(36.8%)                             | 219(48.0%)          | 69(15.1%)                              | 1.00 (ref)                                                |                      |                  |
| Early onset VF† | 30(25.2%)                              | 51(42.9%)           | 38(31.9%)                              | 1.79(1.34-2.40)                                           | 7.4×10 <sup>-5</sup> | 0.76             |
| Late onset VF‡  | 51(25.0%)                              | 92(45.1%)           | 61(29.9%)                              | 1.71(1.35-2.17)                                           | 1.0×10 <sup>-5</sup> |                  |

† VF occurring within 5 minutes of onset of chest pain

‡ VF occurring after more than 30 minutes of onset of chest pain

\* Compares early onset or late onset VF against controls adjusted for age and sex

§ Compares early onset vs. late onset VF; adjusted for age and sex

## Supplementary Figure 1

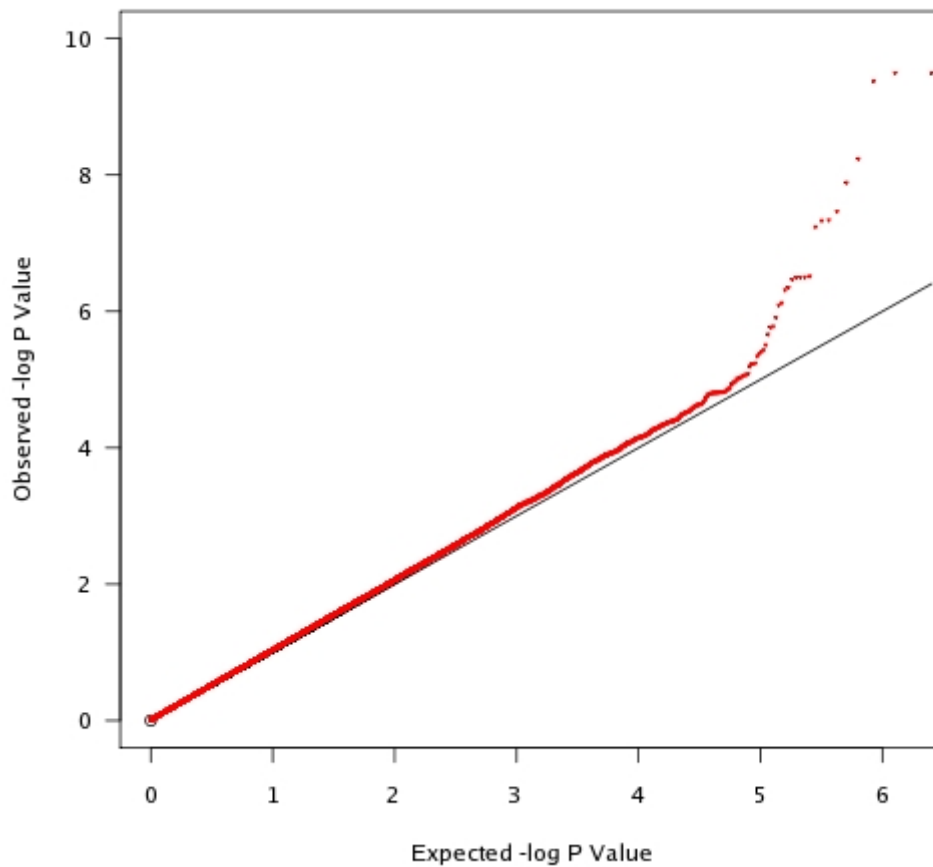

**Supplementary Figure 1. Quantile-Quantile Plot of Test Statistics (P-values) for the Associations of Single-Nucleotide Polymorphisms with Ventricular Fibrillation in the AGNES Population.** Under the null hypothesis of no association, the data points would be expected to fall on the black line. P-values corrected for possible population stratification by means of the genomic control method are presented ( $\lambda=1.026$ ).

## Supplementary Figure 2

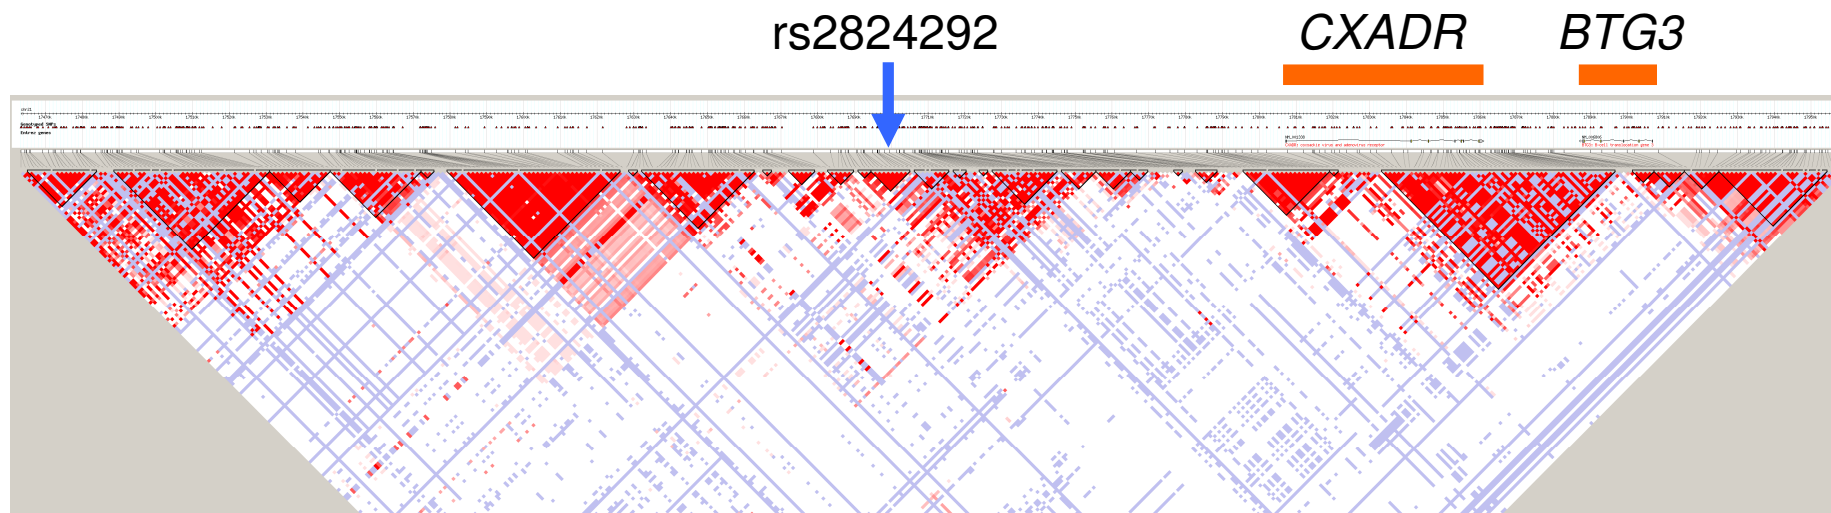

**Supplementary Figure 2. Haploview plot of linkage disequilibrium ( $D'$ ) for all CEU HapMap SNPs in a 500 Kb region spanning **rs2824292**. Colour scheme:  $D' < 1$  and  $\text{LOD} < 2$  = white,  $D' = 1$  and  $\text{LOD} < 2$  = blue,  $D' < 1$  and  $\text{LOD} \geq 2$  = shades of pink/red,  $D' = 1$  and  $\text{LOD} \geq 2$  = bright red.**
